# Supplementary material
Source: Springer Nature journal article supplement (https://www.springermedizin.de/resource/supplementary/12872_2014_703_MOESM5_ESM.pdf/9430684)
Supplement: MOESM5 [file 9430684]

## Standardised Questionnaire

### Risk factor Assessment

- Demographic Data
- Medical Comorbidities
- Medications
- EuroSCORE/STS

### HRQOL Assessment

- KCCQ
- EuroQOL

## Pre-procedural Assessment

### Neurological Assessment

- NIHSS

### Cognitive Assessment

- MoCA
- CAM

### Functional Assessment

- 6MWT
- Gait Speed test (5m)
- Frailty Index

### Imaging

- Echocardiogram
- Carotid Duplex USS
- CT chest
- MRI

### Serology

- S100B
- GFAP

## Intra-procedural Assessment

### Time-stamped Monitoring

- Cerebral O<sub>2</sub> saturation
- Haemodynamic data
  - Intra-arterial line trace
  - ECG trace (single lead)

### Procedural Data Record

## Inpatient

Serial Assessments

### Neurological Assessment

- NIHSS
- +/- mRankin

### Cognitive Assessment

- MoCa
- CAM

### Functional Assessment

- 6MWT
- Gait Speed test (5m)
- Frailty Index

### Serology

- S100B
- GFAP

### Imaging

- Echocardiography
- MRI (day 4 ± 2)

## Outpatient Follow-up

6 weeks & 6 months

### Neurocognitive Assessment

- MoCA
- CAM

### Functional Assessment

- 6MWT
- Gait Speed test (5m)
- Frailty Index

### HRQOL Assessment

- KCCQ
- EuroQOL

### Imaging

- MRI (6 months)
